# 1 Biotic and abiotic factors predict the 2 biogeography of soil microbes in the Serengeti

3 Bo Maxwell Stevens<sup>1</sup>, Derek Lee Sonderegger<sup>2</sup>, and Nancy Collins Johnson<sup>1,3</sup>

4 <sup>1</sup>School of Earth and Sustainability, Northern Arizona University, Flagstaff, AZ 86011, USA

5 <sup>2</sup>Department of Mathematics and Statistics, Northern Arizona University, Flagstaff, AZ 86001,  
6 USA

7 <sup>3</sup>Department of Biological Sciences, Northern Arizona University, Flagstaff, AZ 86011, USA

## 8 Corresponding Author

9 Bo Maxwell Stevens ([bo\\_stevens@nau.edu](mailto:bo_stevens@nau.edu))

## 10 Keywords

11 Soil bacteria, community ecology, grazing, Serengeti National Park, soil texture, phosphorus

## 12 Abstract

13 Field-based observational research is the first step in understanding the factors that  
14 predict the biogeography and community structure of soil microbes. The Serengeti National  
15 Park in Tanzania is an ideal location for this type of research because active volcanoes  
16 generate strong environmental gradients due to ash deposition and a rain shadow. Also, as one  
17 of the last remaining naturally grazed ecosystems on Earth, the Serengeti provides insights  
18 about the influence of herbivory on microbial communities. We used 16S rRNA amplicons to  
19 characterize bacterial and archaeal communities in soils from a 13-year herbivore removal  
20 experiment to study the influence of environmental factors and grazing on the natural  
21 distribution of soil microbes. We collected soil samples from seven sites, each with three  
22 naturally grazed plots and three plots that were fenced to prevent grazing by large mammalian

23 herbivores. Soil fertility (phosphorus, nitrogen, iron, calcium, organic matter), texture, and pH  
24 were measured at each plot. Beta diversity of bacterial and archaeal communities was most  
25 strongly correlated with soil texture ( $R^2 = 32.4\%$ ). The abundance of many operational  
26 taxonomic units (OTUs) were correlated with soil texture, and the evenness of taxa within  
27 samples increased with fine-textured soil. Removal of grazing shifted community structure, with  
28 31 OTUs that were significant indicator taxa of the ungrazed treatment and three OTUs that  
29 were significant indicators of the grazed treatment.

## 30 Importance

31 Our results show that in this regional scale study, soil texture was the best  
32 environmental predictor, and grazing by large mammals also structures bacterial and archaeal  
33 communities. When large mammals are removed, as humans have been doing for millenia,  
34 there are cascading effects into the microbial world that can influence ecosystem functions like  
35 carbon and nitrogen cycles. These empirical findings from a natural tropical savannah can help  
36 inform models of the global distribution and function of soil microbes.

## 37 Introduction

38 Soil bacteria and archaea serve critical functions in natural ecosystems. Many  
39 environmental factors can be used to predict the distribution and diversity of communities of  
40 bacteria within the soil (Fierer, 2017). Although recent studies have elucidated patterns in the  
41 structure of bacterial communities, disentangling their biogeography by determining the  
42 underlying mechanisms affecting the distribution of bacteria and archaea (hereafter referred to  
43 as microbes) remains a challenge. The Serengeti National Park in Tanzania provides an ideal  
44 environmental gradient for investigating the effects of abiotic and biotic factors on microbial  
45 communities. Four mechanisms underlying the biogeography of soil microbes have been  
46 identified: selection, dispersal, drift, mutation (Hanson *et al.*, 2012). The purpose of this study is

47 to consider how environmental selection and dispersal by large animals influences the  
48 biogeography of soil microbes in the Serengeti. To accomplish this, we examined the diversity  
49 and distribution of microbial communities across a natural gradient of abiotic conditions that is  
50 superimposed on a replicated experiment that removed large mammalian herbivores for 13  
51 years.

52 In the Serengeti, local topography and volcanic inputs have created inverse gradients of  
53 soil properties and precipitation (Anderson & Talbot, 1965; Ashley *et al.*, 2014). Active  
54 volcanoes to the east continue to influence the geologic context with eruptions as recent as  
55 2008 (Sinclair & Arcese, 1995; Vaughan *et al.*, 2008). Ash deposits from the nearby Ngorongoro  
56 Volcanic Highlands create gradients of calcium, iron, phosphorus and pH (Anderson & Talbot,  
57 1965; Ruess & Seagle, 1994; Ashley *et al.*, 2014). Many studies have found that pH is a  
58 significant driver of microbial community composition globally (Fierer & Jackson, 2006; Lauber  
59 *et al.*, 2009; Griffiths *et al.*, 2011; Kaiser *et al.*, 2016). Phosphorus availability is linked to soil pH,  
60 calcium, and iron because of chemical interactions on soil particles. Phosphorus availability is  
61 highest in neutral pH ranges. Calcium immobilizes phosphorus above neutral pH ranges  
62 (Schachtman *et al.*, 1998; Brady & Weil, 2017), and iron can immobilize phosphorus below a  
63 neutral pH, indirectly affecting the growth of microbes and plants (Vance *et al.*, 2003; Pigna &  
64 Violante, 2003). Increasing phosphorus availability can influence microbial communities by  
65 altering assemblages or increasing diversity (Beauregard *et al.*, 2009; Kuramae *et al.*, 2011,  
66 2012; Tan *et al.*, 2012). Abiotic soil characteristics directly affect microbial communities by  
67 influencing resource availability and habitat structure, and they indirectly affect bacterial  
68 communities by influencing biotic factors such as vegetation and food webs.

69 Soil microbes exist within a complex web of organisms that includes large grazing  
70 animals with many potential mechanisms for affecting microbial communities. The Serengeti  
71 hosts one of the largest natural grazing ecosystems in the world with currently over two million  
72 large mammalian herbivores (Eby *et al.*, 2014). Moderate levels of grazing can alter soil nutrient

73 concentrations by transporting nutrients and modifying plant communities (Anderson *et al.*  
74 2007). In ecosystems with high soil fertility where nutrient cycling is dominated by bacteria,  
75 grazing may have a positive effect on decomposer bacteria (Bardgett & Wardle, 2003). In  
76 addition to the direct effects of urine and dung on soil biota (McNaughton *et al.*, 1997; Bardgett  
77 *et al.*, 1998), grazing can indirectly influence microbial diversity by stimulating net primary  
78 productivity and aboveground biomass (McNaughton, 1979, 1985), leading to increased  
79 photosynthesis and root exudation (Bardgett *et al.*, 1998). Also, grazing may influence the  
80 composition of plant communities which may alter the composition of microbial communities  
81 (Prober *et al.*, 2015). Comparison of soil microbes between grazed and ungrazed treatments in  
82 a long-term field experiment will help elucidate shifts in bacterial communities resulting from the  
83 cascade of biotic and abiotic responses to the activities of large mammalian herbivores.

84         Although no single factor consistently explains the biogeography of soil microbes, certain  
85 environmental variables tend to correspond with spatial patterns in the composition and  
86 abundance of bacteria. Soil organic matter, pH, redox status, soil moisture, nitrogen and  
87 phosphorus availability, and soil texture appear to be important predictors of the structure of soil  
88 microbial communities (Fierer, 2017). Our study tests the hypothesis that selection by many of  
89 these abiotic factors structures microbial communities. Also, we compared microbial  
90 communities inside and outside grazing exclosures to test the hypothesis that seasonal  
91 defoliation by large mammalian herbivores structure microbial communities. The goal of this  
92 study is to increase our understanding of the biogeography of soil microbes in a naturally  
93 grazed, tropical grassland. This knowledge can inform the development of general principles to  
94 help predict the structure and function of soil bacterial communities in changing environments.

95

## 96 **Methods**

### 97 **Sites**

98           In 1999, a herbivore removal experiment was installed at eight sites within the Serengeti  
99 National Park, Tanzania (Fig. 1) (Anderson *et al.*, 2007). Six plots (4 x 4 m) were established at  
100 each site with three randomly assigned plots open to grazing and the other three plots had 2 m  
101 tall chain-linked fences to exclude grazing by large animals including wildebeest, zebras,  
102 Thomson's gazelles, buffalo, and topi (McNaughton, 1985; Anderson *et al.*, 2007). Theft of all  
103 the fences at one site in the eastern corridor prevented its inclusion in this study. Soil samples  
104 were collected from the remaining seven sites during the rainy season in May, 2012.  
105 Precipitation in the Serengeti National Park in 2012 was lowest in the southern (662 mm) and  
106 highest in the northern sites (1143 mm; Table 1).

### 107 **Soil analyses**

108           Soil samples were collected from holes (approximately 15 cm deep) created by  
109 excavating grasses at all seven sites (n = 42). Within six hours of collection, soils were dried for  
110 48 hours in a solar drier. After 2 weeks, the dry samples were brought to the laboratory and  
111 frozen for long-term storage. Frozen soil samples were dried at 103°C and sieved (< 2 mm).  
112 Soil organic matter was measured using loss on ignition, 2 g subsamples were weighed, heated  
113 to 550°C for 24 hours in a Lindberg HB muffle furnace (Lindberg/MPH, Riverside, MI 49084)  
114 then reweighed (Heiri *et al.*, 2001). Soil pH was measured potentiometrically in a 1:2.5  
115 water:soil paste at the Soil Science Laboratory of Sokoine University of Agriculture in Morogoro,  
116 Tanzania (Klute, 1986). To measure total phosphorus, calcium, and iron concentrations, 0.3 g  
117 subsamples were ground and digested in 7 mL concentrated nitric acid and 3 mL 30% hydrogen  
118 peroxide in Milestone 900 Microwave Digester (Ethos Inc., Bristol, United Kingdom). Samples  
119 were digested for 20 minutes and reached a maximum temperature of 425°C. Total soil

120 phosphorus concentration converted to orthophosphate was quantified via colorimetry  
121 (Grimshaw, 1987) on a QuikChem 8000 Series FIA+ (Lachat Instruments, Milwaukee, WI  
122 53218) using QuikChem Method 10-115-01-1-A. Total iron and calcium were measured on an  
123 AAnalyst 100 Atomic Absorption Spectrophotometer (Perkin Elmer, Waltham, MA 02451).  
124 Samples were compared to in-house standards and external standards produced by Ricca  
125 Chemical Company (Arlington, TX 76012) and Hach Company (Loveland, CO 80539).

126 Soil texture was determined using laser diffraction particle size analysis (Beuselinck *et*  
127 *al.*, 1998). Unsieved soil samples were suspended in water and analyzed on a LS 13 320 Series  
128 Laser Diffraction Particle Size Analyzer (Beckman Coulter Brea CA 92821). Particle sizes were  
129 grouped according USDA soil texture classification. Our soil textural classification figure was  
130 generated from R code available online (Hamilton, 2014). Soil bulk density and total soil  
131 nitrogen concentrations were obtained from previous analyses from the same plots (Antoninka  
132 *et al.*, 2015). Measurements of soil organic matter, total phosphorus, nitrogen, calcium, and iron  
133 were adjusted by bulk density.

### 134 **Molecular analysis**

135 Amplicons were produced in a two-step protocol (Berry *et al.*, 2011). Samples were  
136 amplified in triplicate PCR reactions for the 16S v4 region using the universal bacterial primers  
137 515F (5'-GTGCCAGCMGCCGCGGTAA-3') and 806R (5'-GGACTACHVGGGTWTCTAAT-3')  
138 (Bates *et al.*, 2011). First round reactions were performed in triplicate in 384 well plates. The 8  
139  $\mu$ L volumes contained the following: 1  $\mu$ M each primer, 200  $\mu$ M each dNTP (Phenix Research,  
140 Candler, NC), 0.01 U/ $\mu$ L Phusion HotStart II DNA Polymerase (Life Technologies), 1X HF  
141 Phusion Buffer (Life Technologies), 3 mM MgCl<sub>2</sub>, 6% glycerol, and 1  $\mu$ L normalized template  
142 DNA. Cycling conditions were: 2 minutes at 95°C followed by 20 cycles of 30 seconds at 95°C,  
143 30 seconds at 55°C, 4 minutes at 60°C. Triplicate reactions for each sample were pooled by  
144 combining 4  $\mu$ L from each well, and 2  $\mu$ L was used to check for results on an agarose gel. The

145 remainder was diluted 10-fold and used as template in a second PCR reaction in which indexed  
146 tails (Caporaso *et al.*, 2012) were added. Second round reaction conditions were identical to the  
147 first round except only one reaction was conducted per sample and only 15 total cycles were  
148 performed. Indexed PCR products were purified using carboxylated magnetic beads (Rohland &  
149 Reich, 2012), quantified by PicoGreen fluorescence, and an equal mass of each sample was  
150 combined into a final sample pool. The pool was purified and concentrated, and subsequently  
151 quantified by quantitative PCR against Illumina DNA Standards (Kapa Biosystems, Wilmington,  
152 MA). Sequencing was carried out on a MiSeq Desktop Sequencer (Illumina Inc, San Diego, CA)  
153 running in paired end 2x150 mode. Upon acceptance, sequence will be archived in the NCBI  
154 Sequence Read Archive.

## 155 **Data analysis**

156 The forward reads of the 16S amplicons were imported into QIIME 2 version 2018.11  
157 (Bolyen *et al.*, 2018). Demultiplexing was carried out using minimum quality threshold of q20  
158 and default parameters in QIIME 2. Based on quality threshold, visualized with FastQC version  
159 11.7, reads were trimmed to 139 bases (Andrews, 2010). To determine phylogenetic diversity  
160 metrics, a rooted phylogenetic tree was created with MAFFT sequence alignment and FastTree  
161 in QIIME 2. QIIME 1.9.1 was used to filter samples below 0.005% abundance (Caporaso *et al.*,  
162 2010; Bokulich *et al.*, 2013). To remove singletons by sample, the `otu_picking_workflow.sh`  
163 command in `akutils v1.1.1` was performed (Andrews, 2018). Alpha and beta diversity metrics  
164 were performed with the `q2-diversity` plugin for QIIME 2 using the `core-metrics-phylogenetic`  
165 command with a sampling depth of 45000. We used Shannon diversity index to capture  
166 bacterial richness and evenness. To estimate alpha diversity with phylogenetic structure, we  
167 used Faith's Phylogenetic Diversity index (Faith, 1992). To separate community evenness, we  
168 used Pielou's evenness index, where values are constrained to 0 and 1, with higher values  
169 representing even abundance of community members. To generate figures, we used the `scikit-`

170 bio 0.2.3 (<http://scikit-bio.org>), matplotlib 3.1.0, and seaborn 0.9.0 python packages. Upon  
171 acceptance, our environmental data, correlation matrix, and OTU table will be made publically  
172 available on Dryad Digital Repository (<https://datadryad.org>).

## 173 **Statistical analyses**

174 In an attempt to account for spatial autocorrelation, beta diversity of bacterial  
175 communities were analyzed with single regressions (Anderson *et al.*, 2011) of Bayesian general  
176 linear mixed effects models using the “rstanarm” R package version 2.17.4 (Stan Development  
177 Team, 2017). Weighted and unweighted UniFrac (Lozupone & Knight, 2005), and Bray-Curtis  
178 dissimilarity for all unique non-zero pairs of plots was the response variable (n = 861 for each  
179 metric). Standardized values for distance between continuous environmental variables were  
180 used to predict beta diversity. Grazing treatment categories were created for all possible  
181 combinations of treatments (e.g. beta diversity of grazed vs grazed, grazed vs ungrazed, and  
182 ungrazed vs ungrazed samples). We included a random effect for spatial autocorrelation that  
183 represented all unique alphabetized combinations of sites. Additionally, we used a random  
184 slope for each model.

185 Eleven predictor variables were analyzed for all models; grazing treatment, soil organic  
186 matter (SOM), pH, rainfall, percent sand, silt, and clay, and total concentrations of nitrogen,  
187 phosphorus, calcium, and iron. Rainfall for 2012 was as determined by satellite measurements  
188 from NASA’s Global Precipitation Measurement mission (Hou *et al.*, 2013). Means and a 95%  
189 credible interval for the posterior distribution are reported in Table 2 and Fig. 7. To estimate  
190 variation explained by each model, the ‘bayes\_R2’ function in ‘rstanarm’ was used to calculate  
191 an r-squared (Stan Development Team, 2017). To determine the variation explained by the  
192 fixed effect of each model, the full model r-squared ( $R^2$  Full) was partitioned into an r-squared  
193 for the fixed ( $R^2$  Fixed) and random effect ( $R^2$  Random) by calculating the sum squared error for  
194 the full model and for a null model with random effects only. All models used three chains with



195 default parameters (family = gaussian, prior = normal, iterations = 2000, adapt = 0.99), and all  
196 models converged (Rhat < 1.05).

197 To summarize overall patterns between bacterial community composition and abiotic  
198 factors, we used principal coordinate analysis (PCoA) and the Spearman's rank correlation  
199 coefficient in the BIOENV function from scikit-bio. To test the effect of abiotic characteristics on  
200 bacterial community composition, we used a distance-based redundancy analysis (db-RDA)  
201 (Legendre & Anderson, 1999) performed with forward and backward model selection using the  
202 'capscale' and 'ordistep' functions in the vegan package version 2.5-4 (Oksanen *et al.*, 2018).  
203 We performed the db-RDA analysis on Bray-Curtis dissimilarity with default parameters. Percent  
204 sand was removed from the selected db-RDA model post hoc because it did not contribute to  
205 the overall model. Indicator species analyses of OTUs (operational taxonomic units) were used  
206 to determine which bacteria were associated with grazing treatments and sites using the  
207 'multipatt' function in the 'indicspecies' package version 1.7.6 (De Cáceres & Legendre, 2009)  
208 package in R (version 3.3.0) with default values. Only OTUs with significant indicator species ( $P$   
209 < 0.05) are reported. P-values were determined with 999 permutations. The square root of the  
210 indicator value (func = "IndVal.g") was used as the test statistic.

## 211 Results

212 Soil nutrient analyses indicated significant edaphic gradients created by the Ngorongoro  
213 Volcanic Highlands (Fig. 1; Table 1). As expected, soil throughout the southern Serengeti plains  
214 is enriched by volcanic deposits rich in phosphorus, iron, and calcium, with deposits gradually  
215 decreasing with increasing latitude. Soil phosphorus concentration was significantly higher in  
216 the southern site ( $6.1 \text{ mg cm}^{-3}$ ) than the northern site ( $0.1 \text{ mg cm}^{-3}$ ; Table 1). Total soil nitrogen  
217 concentration was between 1.1 and 2.3 ( $\text{mg cm}^{-3}$ ) throughout the seven sites (Table 1). Soil  
218 organic matter ranged from 6.9% (BAL) to 16.2% (BRS; Table 1). Total calcium and iron  
219 concentrations were lowest in the northern site ( $1.8$  and  $4.5 \text{ mg cm}^{-3}$ , respectively) and highest

220 in the southern site (20.2 and 24.0 mg cm<sup>-3</sup>, respectively; Table 1). Sites in the north were  
221 comprised of sandy loam soil with low phosphorus concentration while sites in the south were  
222 silty loam with high phosphorus concentration (Fig. 1; Fig. 2; Table 1). Because of the influence  
223 of volcanic ash, many of the environmental variables were highly correlated (Fig. S1). Notably,  
224 percent sand, silt, and clay were more than 90% correlated with each other and between 70 and  
225 90% correlated with phosphorus concentration (Fig. S1).

226 After read quality filtering, sequencing resulted in a total of 5,702,184 reads matching a  
227 total of 32,372 OTUs. To remove potentially erroneous OTUs (operational taxonomic units), we  
228 used a stringent OTU table filtering threshold that removes singletons by sample and OTUs  
229 below 0.005% of total sequence abundance (Bokulich *et al.*, 2013). OTU table quality filtering  
230 resulted in 4,431,104 (78.7%) sequences matching 2,782 OTUs (8.6%). For all 42 samples, we  
231 had an average of 105,502 sequences per sample, with a minimum of 52,139 and maximum of  
232 162,093 sequences.

233 Microbial communities in this study were primarily dominated by Actinobacteria (19.5%),  
234 Proteobacteria (19.5%), and Acidobacteria (19.2%). Other significant (> 5%) phyla included  
235 Verrucomicrobia (8.0%), Firmicutes (6.0%), Chloroflexi (6.0%), and Planctomycetes (5.5%).  
236 Phyla with 5% or less relative abundance comprised 16.2% of the overall abundance. Average  
237 relative abundances for each site are reported in Fig. 3a. We used four different alpha diversity  
238 metrics to determine if environmental variables are related to richness and evenness (Fig. S2).  
239 We highlight the strong correlation between percent silt and evenness in Fig. 3c. Average  
240 Shannon diversity for each site ranged from 8.8 ( $\pm$  0.2) in BAL to 9.3 ( $\pm$  0.1) in BRS and was  
241 correlated positively with percent silt ( $R^2 = 0.17$ ) and total phosphorus concentration ( $R^2 = 0.14$ ).  
242 Overall, evenness was high throughout our study, ranging from 0.86 ( $\pm$  0.01) to 0.91 ( $\pm$  0.01).  
243 Evenness of communities was positively correlated with silt ( $R^2 = 0.16$ ), phosphorus ( $R^2 = 0.25$ ),  
244 and pH ( $R^2 = 0.11$ ), and negatively correlated with rainfall ( $R^2 = 0.33$ ). Average Faith PD, a  
245 phylogenetic diversity estimate, was lowest in BAL (61.2  $\pm$  14.3) and highest in MSB (82.1  $\pm$

246 6.0) and was not highly correlated with environmental variables. Similarly, richness as  
247 measured by the number of observed OTUs, was lowest in BAL ( $859 \pm 242.2$ ) and highest in  
248 MSB ( $1253 \pm 156.2$ ) and was not correlated with environmental variables. Relative abundances  
249 of many of the 50 most common OTUs were strongly correlated with one or more environmental  
250 variables, mainly soil texture (Fig 4; Table S2). Of the 12 strongest correlations, nine had  
251 positive and three had negative relationships with percent silt (Fig. S3; Table S2). Indicator  
252 species analysis of the grazing treatments revealed that all indicator OTUs were in the bacterial  
253 kingdom (Table S3), three OTUs were indicators of grazed plots and 31 were indicators of  
254 ungrazed plots (Figure 3b; Table S3).

255 To estimate the importance of environmental variables on the beta diversity of bacterial  
256 communities, we used spearman rank correlation coefficients with distance matrices for three  
257 different beta diversity metrics. Phylogenetic (UniFrac) and non-phylogenetic (Bray-Curtis)  
258 metrics were similar across four highlighted environmental variables, phosphorus concentration,  
259 rainfall, percent silt, and pH (Fig. S4). Despite high correlations between the measurements  
260 (Fig. S1) of phosphorus with silt ( $r = 0.71$ ) and pH ( $r = 0.75$ ), spearman correlations were much  
261 higher for percent silt (30.5 to 40.6%; Fig. 3d; Fig S4), and low for pH (between -7 and -2.9%;  
262 Fig. S4). Phosphorus concentration and rainfall are highly correlated with each other ( $r = -0.83$ ;  
263 Fig. S1), and spearman correlations were similar for both variables and all three beta diversity  
264 metrics (Fig. S4). Much of the dissimilarity of bacterial communities can be attributed to the  
265 presence or absence of OTUs, indicated by the similarities of unweighted UniFrac correlations  
266 and Bray-Curtis (Fig. S4). Slightly higher correlations for the first two PCoA axes of weighted  
267 UniFrac, when compared to unweighted UniFrac, indicates that some variation in the bacterial  
268 communities can be explained by the phylogenetic structure of abundant OTUs (Fig. S4). In  
269 addition, we used a dbRDA to understand the effect of environmental variables on Bray Curtis  
270 distances of bacterial communities. Model selection of dbRDA indicated that soil texture, rainfall,  
271 and phosphorus and iron concentration were important in explaining variation in bacterial

272 community composition ( $F = 2.6$ ,  $p < 0.001$ ; Fig. S5). Overall, the dbRDA explained 16% of the  
273 variation in community composition (adjusted  $R^2 = 0.164$ ).

274 To gain a deeper understanding of the relationship of the effects of grazing and abiotic  
275 characteristics on beta diversity, we used Bayesian linear mixed effects models. To avoid the  
276 multicollinearity between environmental variables, we compared single linear regressions. We  
277 used the leave-one-out information criterion to compare models. Similar to Akaike's information  
278 criterion, lower values indicate better model fit. Model results are reported in Table S4 and  
279 visually represented in Fig. S6. Soil texture and phosphorus provided the best fit for determining  
280 the structure of bacterial communities. Results for both weighted and unweighted UniFrac were  
281 remarkably similar to those of Bray-Curtis. Percent clay, silt, and sand were three of the top four  
282 models. Total phosphorus concentration ranked third on our list of models, the 95% credible  
283 interval for phosphorus concentration in relation to beta diversity slightly overlapped zero (CI =  
284 [0.00, 0.53]), however, the mean of the posterior distribution (0.27) was the largest and was  
285 consistent with an effect, which may indicate that a large portion of the bacterial community  
286 structure is determined by levels of this important nutrient. Beta diversity values ( $y$ ) range  
287 between 0.19 and 0.85, and standardized coefficients ( $x$ ) ranged from 0 to approximately 3.  
288 Therefore, a mean posterior distribution for a coefficient with a value of 0.27 (phosphorus) would  
289 indicate that for every 1 unit of change in the standardized  $x$ -value, beta diversity increases by  
290 0.27, a large difference considering the range of possible values. Linear mixed models with  
291 other environmental variables produced fixed effect correlations near zero. Model results for the  
292 grazing treatment (CI = [-0.07, -0.02]) are consistent with an effect of grazing on the beta  
293 diversity of bacteria (2% of variation explained).

## 294 Discussion

295 Because the Serengeti is a relatively undisturbed grassland, we can assume that the soil  
296 microbes observed in this study represent a long-term, stable community, notwithstanding

297 seasonal fluctuations. Furthermore, microbial populations likely reflect interactions with the  
298 macrofauna through reciprocal upward and downward trophic cascades (Sinclair *et al.*,  
299 2010)(Anderson *et al.*, 2007; Stevens *et al.*, 2018)(Sinclair *et al.*, 2010); Stevens *et al.*, 2018).  
300 Results of this study reveals the importance of soil texture and mineral content in structuring  
301 microbial communities, and we also show that grazing by large, migratory mammals impacts  
302 microbial communities within the topsoil of the Serengeti National Park. The global distribution  
303 of bacteria has been linked to a hierarchy of correlated factors, and especially soil pH, organic  
304 matter and nitrogen availability (Fierer, 2017). Many studies have found that soil pH is a  
305 significant driver of bacterial diversity (Fierer & Jackson, 2006; Lauber *et al.*, 2009; Griffiths *et*  
306 *al.*, 2011; Kaiser *et al.*, 2016); but we observed pH to have little relationship with the soil  
307 microbes in the Serengeti (Figs. 4, S2-S6; Table S4). A likely reason why our results are not  
308 consistent with the literature is that the neutral soil pH range (6.3 to 7.8) observed in this study  
309 which is ideal for microbial diversity, as opposed to the larger range of pH (3 - 9) captured  
310 globally (Fierer & Jackson, 2006). Furthermore, in contrast to a global analysis showing  
311 relationships between soil microbial communities and organic matter and nitrogen availability  
312 (Fierer 2017), our study showed no relationship between microbial diversity and these soil  
313 variables (Figs. 4, S5, and S6; Table S4). Instead, we found that the richness and evenness of  
314 microbes increased in sites with finer textured soil (Figs. 3 and S2) and specific OTUs were  
315 highly correlated with texture variables (Fig. 4).

316 For organisms living at the scale of soil particles, the size and manner in which those soil  
317 particles coalesce can have a profound influence. Many studies have reported a connection  
318 between soil particle size and microbial diversity (Sessitsch *et al.*, 2001; Carson *et al.*, 2010;  
319 Chau *et al.*, 2011; Neumann *et al.*, 2013). Sand has larger pores with higher connectivity and  
320 therefore retains less water and nutrients than finer textured soil. The strong relationship  
321 between microbial community structure and soil texture could be linked to water potential, soil  
322 moisture, pore connectivity, and nutrient diffusion, rather than the texture itself (Saxton & Rawls,

2006; Dechesne *et al.*, 2008; Carson *et al.*, 2010; Serna-Chavez *et al.*, 2013; Neumann *et al.*, 2013). A previous study found microbial abundance to be positively correlated with water holding capacity and soil moisture in finer textured soil in the Serengeti (Ruess & Seagle, 1994). Biotic interactions are influenced by water content, pore connectivity, and nutrient diffusion and could also influence microbial abundance and diversity. Small soil pores in fine textured soils may provide microbes a refuge from predation by bacterivorous protozoa and nematodes; and thus, loss through predation is likely to be higher in wetter, coarser soils that enable motility (Hassink *et al.*, 1993; Nielsen *et al.*, 2014). Furthermore, highly connected water-filled pores may favor competitive interactions (Treves *et al.*, 2003). Models of two bacterial species indicate less coexistence in wet soil conditions because connectivity facilitates interactions among microbes such that highly competitive species can more easily exclude poor competitors in saturated soil compared to dry soil (Hardin, 1960; Dechesne *et al.*, 2008; Long & Or, 2009). Overall, the structure of microbial communities in the Serengeti likely reflect both the top-down biotic influences of predation and bottom-up abiotic factors.

Our results indicate that environmental gradients resulting from volcanic inputs of ash influence the biogeography of microbes in the Serengeti, but it is impossible to uncouple the interconnected soil factors that arise from the volcanic deposits. Phosphorus concentration explained 14% of the variation in community composition and was consistent with a strong effect on beta diversity (Table S4; Fig. S6). Soil texture, on the other hand, explained 17% of the variation but was inconsistent with an effect on beta diversity (Table S4; Fig. S6), even with a strong gradient in soil texture (from 25% to almost 60% silt). Therefore, it is likely that both phosphorus concentration and soil texture directly and indirectly (through biotic interactions) influence microbial community structure. Results from our mixed models indicate that further research is necessary to completely disentangle the effects of soil texture and phosphorus concentration. An experimental design created to separate mineralogy from soil texture could help separate these effects.

349

350 Life in Serengeti soil evolved to co-exist beneath one of the largest mammalian  
351 migrations on Earth. We would expect the exclusion of large herbivores should have an effect  
352 on the microbial communities and our linear mixed model results are consistent with that  
353 prediction (Fig. 3b; Table S4; Fig. S6). Further, we found 34 total indicators of grazing, including  
354 one OTU within Rhizobiaceae (Table S3), some of which are known to fix nitrogen within plant  
355 roots (Spaink *et al.*, 2012). An association between Rhizobiaceae and plants within grazed plots  
356 could indicate a cooperative strategy to compensate for aboveground herbivory (Ramula *et al.*,  
357 2019). Specifically, we found three indicators of grazing and 31 indicators of ungrazed plots  
358 (Fig. 3b, Table S3). There are many potential mechanisms by which herbivory might influence  
359 soil microbial communities (Bardgett *et al.*, 1998). The influx of nutrients from mammalian waste  
360 products could cause a shift in bacterial communities, increasing community differences  
361 between grazed plots, especially at larger spatial distances, while ungrazed plots maintain  
362 higher similarity, as our data implies (Figs. 3 and S6; Tables S3 and S4). Herbivory has altered  
363 the composition of plant communities at our sites, which in turn could alter bacterial  
364 communities (Anderson *et al.*, 2007; Prober *et al.*, 2015). Arbuscular mycorrhizal fungi can  
365 influence the community structure of soil bacteria (Artursson *et al.*, 2006), and the abundance of  
366 these fungi has been shown to be higher inside the fences that exclude herbivores and also in  
367 the southern sites with fine textured soil and higher phosphorus content (Antoninka *et al.*, 2015;  
368 Stevens *et al.*, 2018, 2020). Millions of migratory mammals offer soil microbes dispersal  
369 opportunities resulting in more homogenous communities (Vos *et al.*, 2013). Future research is  
370 needed to link the mammalian microbiome with the soil microbiome using a time-series of  
371 sampling that coordinates with the grazing cycle in the Serengeti.

372 Much of the biogeography of microbial communities remains a mystery, but our data  
373 provides some insights into the distribution of soil microbes in a naturally grazed grassland. This  
374 study highlights the importance of soil properties, and especially texture in structuring a

375 significant portion of microbial evenness and beta diversity. Additionally, we discovered that the  
376 removal of mammalian herbivores had a measurable effect on the beta diversity of microbial  
377 communities. Together, these results may help inform predictions of the regional biogeography  
378 of bacteria in natural, tropical grassland ecosystems. Future studies will benefit from a deeper  
379 understanding of microbial functional diversity and the spatial and temporal dynamics of life in  
380 the Serengeti soil.

## 381 Acknowledgements

382 The authors would like to thank Michael Anderson, Mark Ritchie, Jeff Propster, Anita  
383 Antoninka, Dan Revillini for their advice and input. We also thank Gustavo Zimmer for help with  
384 DNA extractions, and Lela Andrews and the NAU Environmental Genetics and Genomics  
385 Laboratory (EnGGen), Northern Arizona University, Flagstaff, AZ ([nau.edu/enggen](http://nau.edu/enggen)) for help with  
386 sequencing. Thanks to Emery Cowan for her contribution to the efficacy of the science  
387 communication.

## 388 Author contributions

389 NCJ planned, designed the research, and collected samples. BMS performed  
390 bioinformatics, statistical analyses, and created figures. DLS and BMS created and analyzed  
391 linear models. BMS analyzed and, with the help of NCJ, interpreted data. BMS created figures  
392 and wrote the first draft of the manuscript. NCJ edited the final version.

## 393 References

394 **Anderson MJ, Crist TO, Chase JM, Vellend M, Inouye BD, Freestone AL, Sanders NJ,**  
395 **Cornell HV, Comita LS, Davies KF, et al. 2011.** Navigating the multiple meanings of  $\beta$  diversity:  
396 a roadmap for the practicing ecologist. *Ecology Letters* **14**: 19–28.  
397 **Anderson TM, Ritchie ME, McNaughton SJ. 2007.** Rainfall and soils modify plant community  
398 response to grazing in Serengeti National Park. *Ecology* **88**: 1191–1201.  
399 **Anderson GD, Talbot LM. 1965.** Soil factors affecting the distribution of the grassland types  
400 and their utilization by wild animals on the serengeti plains, tanganyika. *Journal of Ecology* **53**:  
401 33–56.



- 402 **Andrews S. 2010.** *FastQC: a quality control tool for high throughput sequence data.*
- 403 **Andrews L. 2018.** *akutils-v1.2.4: Facilitating analyses of microbial communities through QIIME.*
- 404 Zenodo.
- 405 **Antoninka AJ, Ritchie ME, Johnson NC. 2015.** The hidden Serengeti—Mycorrhizal fungi
- 406 respond to environmental gradients. *Pedobiologia* **58**: 165–176.
- 407 **Artursson V, Finlay RD, Jansson JK. 2006.** Interactions between arbuscular mycorrhizal fungi
- 408 and bacteria and their potential for stimulating plant growth. *Environmental Microbiology* **8**: 1–
- 409 10.
- 410 **Ashley GM, Beverly EJ, Sikes NE, Driese SG. 2014.** Paleosol diversity in the Olduvai Basin,
- 411 Tanzania: effects of geomorphology, parent material, depositional environment, and
- 412 groundwater on soil development. *Quaternary International* **322–323**: 66–77.
- 413 **Bardgett RD, Wardle DA. 2003.** Herbivore-mediated linkages between aboveground and
- 414 belowground communities. *Ecology* **84**: 2258–2268.
- 415 **Bardgett RD, Wardle DA, Yeates GW. 1998.** Linking above-ground and below-ground
- 416 interactions: how plant responses to foliar herbivory influence soil organisms. *Soil Biology and*
- 417 *Biochemistry* **30**: 1867–1878.
- 418 **Bates ST, Berg-Lyons D, Caporaso JG, Walters WA, Knight R, Fierer N. 2011.** Examining
- 419 the global distribution of dominant archaeal populations in soil. *The ISME Journal* **5**: 908–917.
- 420 **Beauregard MS, Hamel C, Atul-Nayyar, St-Arnaud M. 2009.** Long-term phosphorus
- 421 fertilization impacts soil fungal and bacterial diversity but not AM fungal community in Alfalfa.
- 422 *Microbial Ecology* **59**: 379–389.
- 423 **Berry D, Mahfoudh KB, Wagner M, Loy A. 2011.** Barcoded primers used in multiplex
- 424 amplicon pyrosequencing bias amplification. *Appl. Environ. Microbiol.* **77**: 7846–7849.
- 425 **Beuselinck L, Govers G, Poesen J, Degraer G, Froyen L. 1998.** Grain-size analysis by laser
- 426 diffractometry: comparison with the sieve-pipette method. *CATENA* **32**: 193–208.
- 427 **Bokulich NA, Subramanian S, Faith JJ, Gevers D, Gordon JI, Knight R, Mills DA,**
- 428 **Caporaso JG. 2013.** Quality-filtering vastly improves diversity estimates from Illumina amplicon
- 429 sequencing. *Nature Methods* **10**: 57–59.
- 430 **Bolyen E, Rideout JR, Dillon MR, Bokulich NA, Abnet C, Al-Ghalith GA, Alexander H, Alm**
- 431 **EJ, Arumugam M, Asnicar F, et al.2018.** *QIIME 2: Reproducible, interactive, scalable, and*
- 432 *extensible microbiome data science.* PeerJ Inc.
- 433 **Caporaso JG, Kuczynski J, Stombaugh J, Bittinger K, Bushman FD, Costello EK, Fierer**
- 434 **N, Peña AG, Goodrich JK, Gordon JI, et al.2010.** QIIME allows analysis of high-throughput
- 435 community sequencing data. *Nature Methods* **7**: 335–336.
- 436 **Caporaso JG, Lauber CL, Walters WA, Berg-Lyons D, Huntley J, Fierer N, Owens SM,**
- 437 **Betley J, Fraser L, Bauer M, et al.2012.** Ultra-high-throughput microbial community analysis
- 438 on the Illumina HiSeq and MiSeq platforms. *The ISME Journal* **6**: 1621–1624.
- 439 **Carson JK, Gonzalez-Quiñones V, Murphy DV, Hinz C, Shaw JA, Gleeson DB. 2010.** Low
- 440 pore connectivity increases bacterial diversity in soil. *Appl. Environ. Microbiol.* **76**: 3936–3942.
- 441 **Chau JF, Bagtzoglou AC, Willig MR. 2011.** The effect of soil texture on richness and diversity
- 442 of bacterial communities. *Environmental Forensics* **12**: 333–341.
- 443 **De Cáceres M, Legendre P. 2009.** Associations between species and groups of sites: indices
- 444 and statistical inference. *Ecology* **90**: 3566–3574.
- 445 **Dechesne A, Or D, Smets BF. 2008.** Limited diffusive fluxes of substrate facilitate coexistence
- 446 of two competing bacterial strains. *FEMS Microbiology Ecology* **64**: 1–8.
- 447 **Eby SL, Anderson TM, Mayemba EP, Ritchie ME. 2014.** The effect of fire on habitat selection
- 448 of mammalian herbivores: the role of body size and vegetation characteristics. *Journal of Animal*
- 449 *Ecology* **83**: 1196–1205.
- 450 **Faith DP. 1992.** Conservation evaluation and phylogenetic diversity. *Biological Conservation*
- 451 **61**: 1–10.
- 452 **Fierer N. 2017.** Embracing the unknown: disentangling the complexities of the soil microbiome.

- 453 *Nature Reviews Microbiology* **15**: 579–590.
- 454 **Fierer N, Jackson RB. 2006.** The diversity and biogeography of soil bacterial communities.  
455 *Proceedings of the National Academy of Sciences of the United States of America* **103**: 626–  
456 631.
- 457 **Griffiths RI, Thomson BC, James P, Bell T, Bailey M, Whiteley AS. 2011.** The bacterial  
458 biogeography of British soils. *Environmental Microbiology* **13**: 1642–1654.
- 459 **Grimshaw HM. 1987.** The determination of total phosphorus in soils by acid digestion. In:  
460 Rowland AP, ed. Chemical analysis in environmental research. NERC/ITE, 92–65.
- 461 **Hamilton N. 2014.** USDA Textural Soil Classification. *R-bloggers*.
- 462 **Hanson CA, Fuhrman JA, Horner-Devine MC, Martiny JBH. 2012.** Beyond biogeographic  
463 patterns: processes shaping the microbial landscape. *Nature Reviews Microbiology* **10**: 497–  
464 506.
- 465 **Heiri O, Lotter AF, Lemcke G. 2001.** Loss on ignition as a method for estimating organic and  
466 carbonate content in sediments: reproducibility and comparability of results. *Journal of*  
467 *Paleolimnology* **25**: 101–110.
- 468 **Hou AY, Kakar RK, Neeck S, Azarbarzin AA, Kummerow CD, Kojima M, Oki R, Nakamura**  
469 **K, Iguchi T. 2013.** The global precipitation measurement mission. *Bulletin of the American*  
470 *Meteorological Society* **95**: 701–722.
- 471 **Jousset A, Bienhold C, Chatzinotas A, Gallien L, Gobet A, Kurm V, Küsel K, Rillig MC,**  
472 **Rivett DW, Salles JF, et al. 2017.** Where less may be more: how the rare biosphere pulls  
473 ecosystems strings. *The ISME Journal* **11**: 853–862.
- 474 **Kaiser K, Wemheuer B, Korolkow V, Wemheuer F, Nacke H, Schöning I, Schrupp M,**  
475 **Daniel R. 2016.** Driving forces of soil bacterial community structure, diversity, and function in  
476 temperate grasslands and forests. *Scientific Reports* **6**: 33696.
- 477 **Klute A. 1986.** Water retention: laboratory methods. *Methods of Soil Analysis: Part 1—Physical*  
478 *and Mineralogical Methods SSSA book series*: 635–662.
- 479 **Kuramae EE, Gamper H, van Veen J, Kowalchuk G. 2011.** Soil and plant factors driving the  
480 community of soil-borne microorganisms across chronosequences of secondary succession of  
481 chalk grasslands with a neutral pH. *FEMS Microbiology Ecology* **77**: 285–294.
- 482 **Kuramae EE, Yergeau E, Wong LC, Pijl AS, van Veen JA, Kowalchuk GA. 2012.** Soil  
483 characteristics more strongly influence soil bacterial communities than land-use type. *FEMS*  
484 *Microbiology Ecology* **79**: 12–24.
- 485 **Lauber CL, Hamady M, Knight R, Fierer N. 2009.** Pyrosequencing-based assessment of soil  
486 pH as a predictor of soil bacterial community structure at the continental scale. *Appl. Environ.*  
487 *Microbiol.* **75**: 5111–5120.
- 488 **Legendre P, Anderson MJ. 1999.** Distance-Based Redundancy Analysis: Testing Multispecies  
489 Responses in Multifactorial Ecological Experiments. *Ecological Monographs* **69**: 1–24.
- 490 **Lozupone C, Knight R. 2005.** UniFrac: a new phylogenetic method for comparing microbial  
491 communities. *Appl. Environ. Microbiol.* **71**: 8228–8235.
- 492 **McNaughton SJ. 1979.** Grazing as an optimization process: grass-ungulate relationships in the  
493 Serengeti. *The American Naturalist* **113**: 691–703.
- 494 **McNaughton SJ. 1985.** Ecology of a grazing ecosystem: The Serengeti. *Ecological*  
495 *Monographs* **55**: 259–294.
- 496 **McNaughton SJ, Zuniga G, McNaughton MM, Banyikwa FF. 1997.** Ecosystem catalysis: soil  
497 urease activity and grazing in the serengeti ecosystem. *Oikos* **80**: 467–469.
- 498 **Neumann D, Heuer A, Hemkemeyer M, Martens R, Tebbe CC. 2013.** Response of microbial  
499 communities to long-term fertilization depends on their microhabitat. *FEMS Microbiology*  
500 *Ecology* **86**: 71–84.
- 501 **Oksanen J, Blanchet F, Friendly M, Kindt R, Legendre P, McGlenn D, Minchin P, O'Hara R,**  
502 **Simpson G, Solymos P, et al. 2018.** Package 'vegan'. Community ecology package, R  
503 package version 2.5-4. <https://CRAN.R-project.org/package=vegan>.

- 504 **Pigna M, Violante A. 2003.** Adsorption of sulfate and phosphate on andisols. *Communications*  
505 *in Soil Science and Plant Analysis* **34**: 2099–2113.
- 506 **Prober SM, Leff JW, Bates ST, Borer ET, Firn J, Harpole WS, Lind EM, Seabloom EW,**  
507 **Adler PB, Bakker JD, et al. 2015.** Plant diversity predicts beta but not alpha diversity of soil  
508 microbes across grasslands worldwide. *Ecology Letters* **18**: 85–95.
- 509 **Ramula S, Paige KN, Lennartsson T, Tuomi J. 2019.** Overcompensation: a 30-year  
510 perspective. *Ecology* **100**: e02667.
- 511 **Rohland N, Reich D. 2012.** Cost-effective, high-throughput DNA sequencing libraries for  
512 multiplexed target capture. *Genome Research* **22**: 939–946.
- 513 **Ruess RW, Seagle SW. 1994.** Landscape patterns in soil microbial processes in the serengeti  
514 national park, tanzania. *Ecology* **75**: 892–904.
- 515 **Saxton KE, Rawls WJ. 2006.** Soil water characteristic estimates by texture and organic matter  
516 for hydrologic solutions. *Soil Science Society of America Journal* **70**: 1569–1578.
- 517 **Serna-Chavez HM, Fierer N, Bodegom PM van. 2013.** Global drivers and patterns of microbial  
518 abundance in soil. *Global Ecology and Biogeography* **22**: 1162–1172.
- 519 **Sessitsch A, Weilharter A, Gerzabek MH, Kirchmann H, Kandeler E. 2001.** Microbial  
520 population structures in soil particle size fractions of a long-term fertilizer field experiment. *Appl.*  
521 *Environ. Microbiol.* **67**: 4215–4224.
- 522 **Sinclair ARE, Arcese P. 1995.** *Serengeti II: dynamics, management, and conservation of an*  
523 *ecosystem*. University of Chicago Press.
- 524 **Sinclair ARE, Metzger K, Brashares JS, Nkwabi A, Sharam G, Fryxell JM. 2010.** Trophic  
525 cascades in African savanna: Serengeti as a case study. In: Trophic cascades: predators, prey  
526 and the changing dynamics of nature. 255–274.
- 527 **Spaink HP, Kondorosi A, Hooykaas PJJ. 2012.** *The Rhizobiaceae: molecular biology of*  
528 *model plant-associated bacteria*. Springer Science & Business Media.
- 529 **Stan Development Team. 2017.** *RStanArm: Bayesian applied regression modelling via Stan*.
- 530 **Stevens BM, Propster JR, Öpik M, Wilson GWT, Alloway SL, Mayemba E, Johnson NC.**  
531 **2020.** Arbuscular mycorrhizal fungi in roots and soil respond differently to biotic and abiotic  
532 factors in the Serengeti. *Mycorrhiza*.
- 533 **Stevens BM, Propster J, Wilson GWT, Abraham A, Ridenour C, Doughty C, Johnson NC.**  
534 **2018.** Mycorrhizal symbioses influence the trophic structure of the Serengeti. *Journal of Ecology*  
535 **106**: 536–546.
- 536 **Tan H, Barret M, Mooij MJ, Rice O, Morrissey JP, Dobson A, Griffiths B, O’Gara F. 2012.**  
537 Long-term phosphorus fertilisation increased the diversity of the total bacterial community and  
538 the phoD phosphorus mineraliser group in pasture soils. *Biology and Fertility of Soils* **49**: 661–  
539 672.
- 540 **Vance CP, Uhde-Stone C, Allan DL. 2003.** Phosphorus acquisition and use: critical  
541 adaptations by plants for securing a nonrenewable resource. *New Phytologist* **157**: 423–447.
- 542 **Vaughan RG, Kervyn M, Realmuto V, Abrams M, Hook SJ. 2008.** Satellite measurements of  
543 recent volcanic activity at Oldoinyo Lengai, Tanzania. *Journal of Volcanology and Geothermal*  
544 *Research* **173**: 196–206.
- 545 **Vos M, Wolf AB, Jennings SJ, Kowalchuk GA. 2013.** Micro-scale determinants of bacterial  
546 diversity in soil. *FEMS Microbiology Reviews* **37**: 936–954.
- 547

## 548 **Figures and Tables**

- 549 Table 1. Annual precipitation (AP), and edaphic properties of the seven study sites in the  
550 Serengeti National Park, Tanzania.  
551 See attached .xlsx spreadsheet

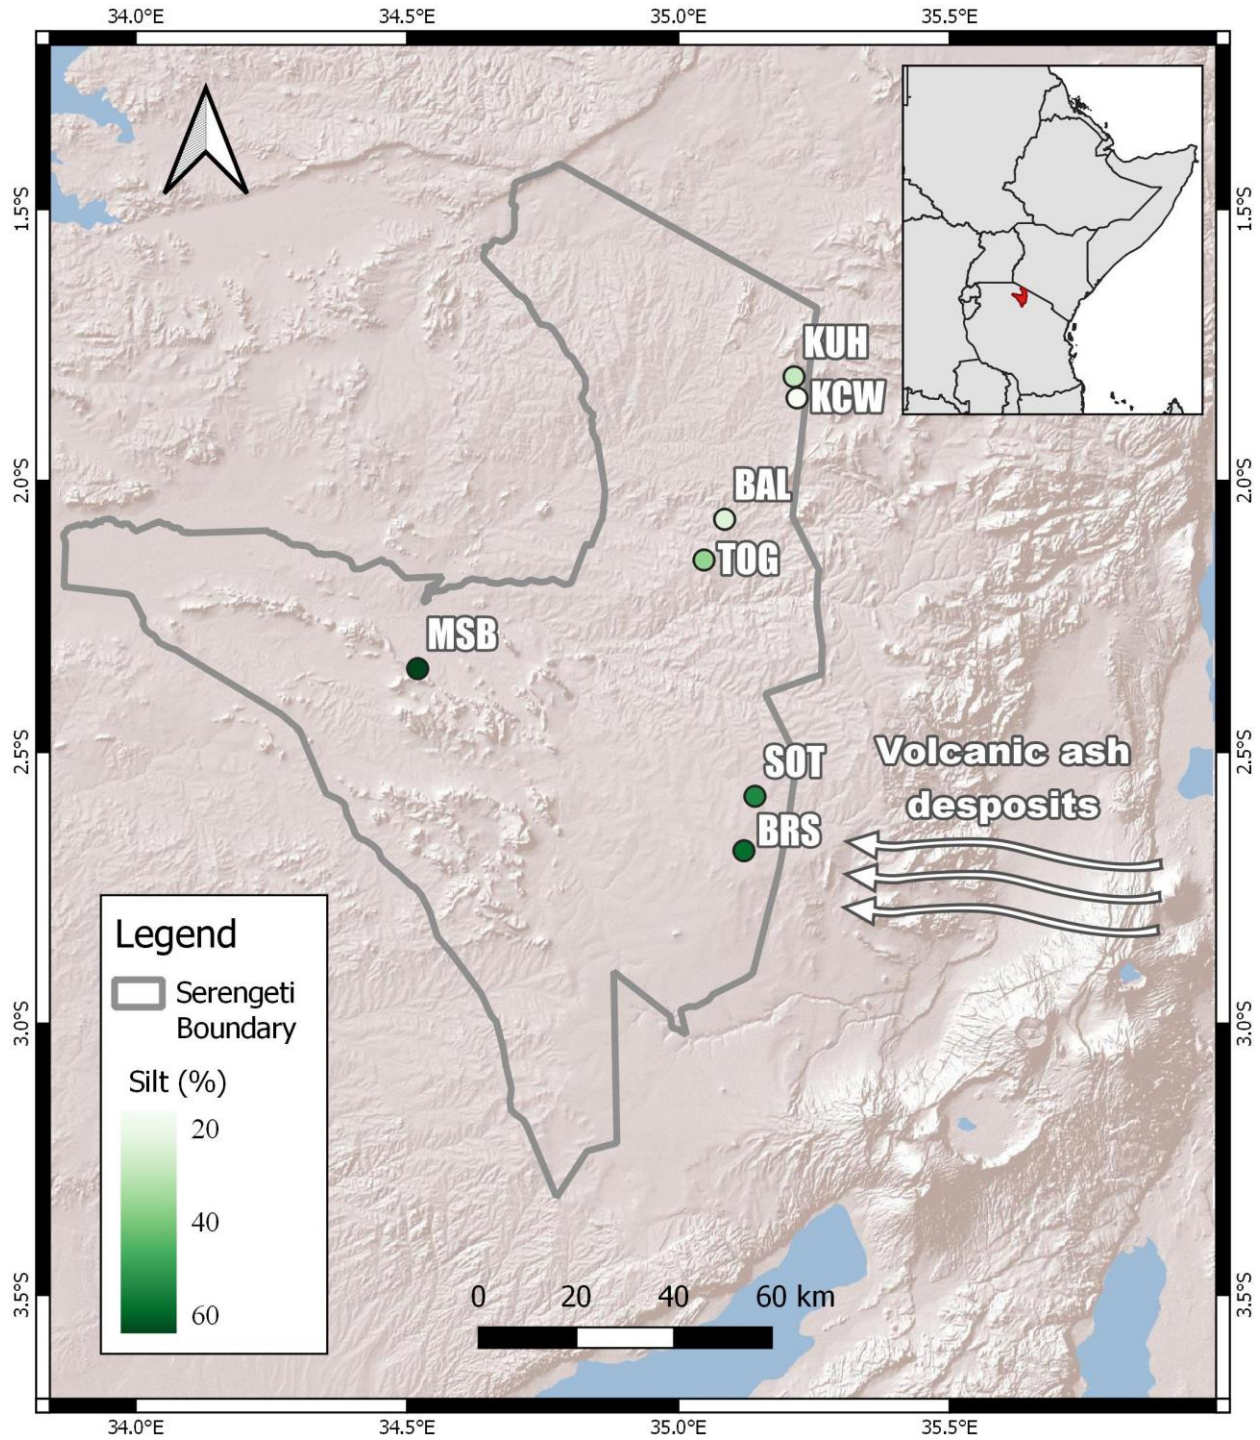

552

553 Figure 1. Locations of the seven study sites within the Serengeti National Park,  
554 Tanzania: Balatines (BAL), Barafu (BRS), Klein's Camp West (KCW), Kuku Hills  
555 (KUH), Soit le Motonyi (SOT), Togora (TOG), and Musabi Plains (MSB). The gradient in soil  
556 texture is illustrated in green, darker color indicates higher percent silt.

557

558

559

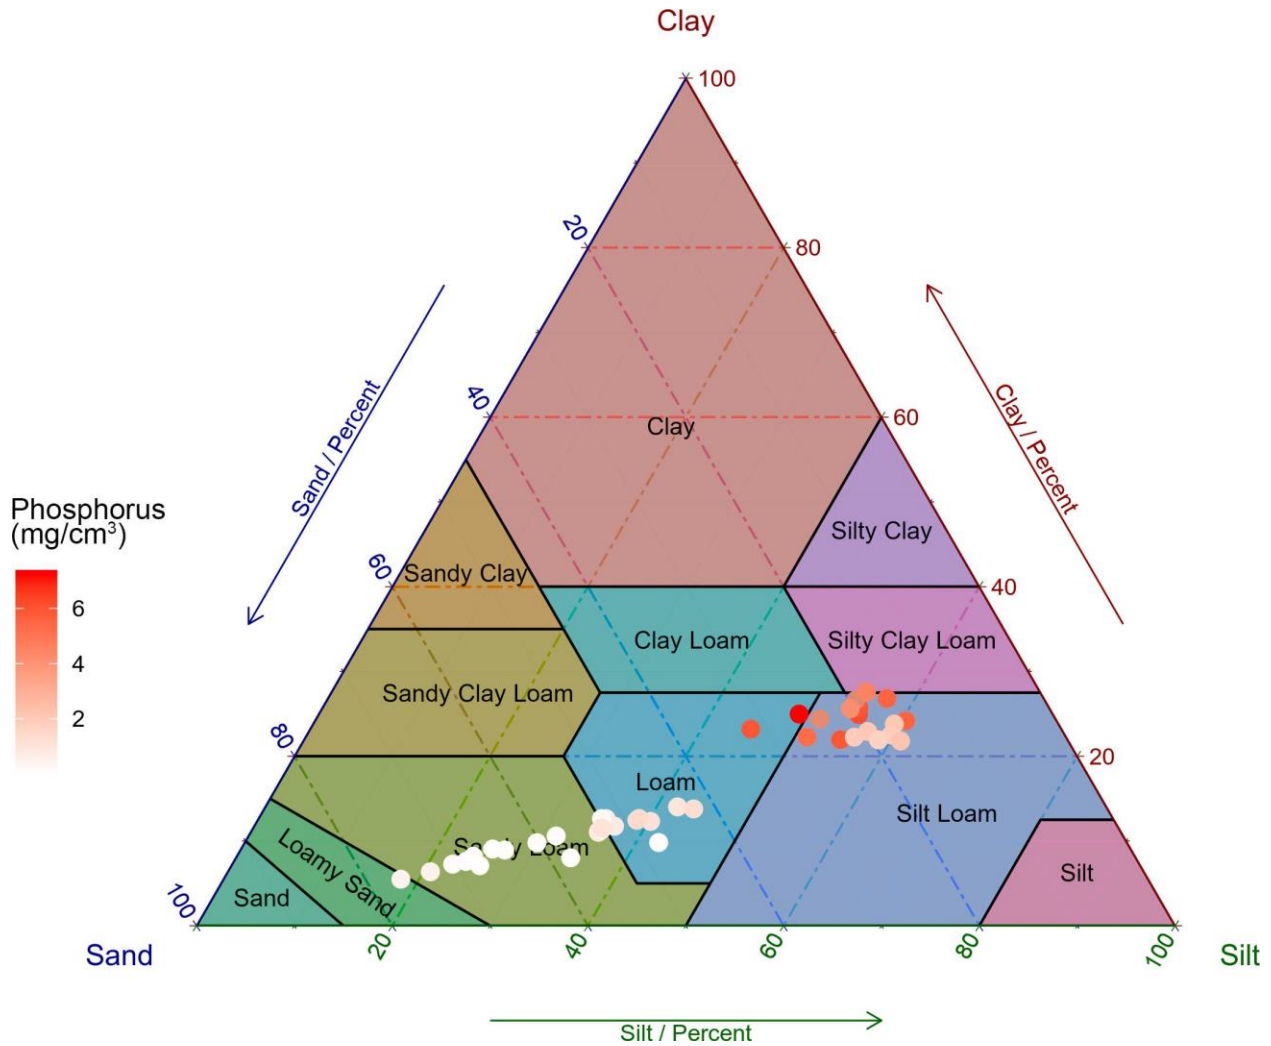

560

561 Figure 2. Soil texture and phosphorus concentration of each plot at seven sites in this study.

562 Plots are colored by soil phosphorus concentration, where darker red indicates fine-textured,

563 high phosphorus soil that result from deposition of volcanic ash from highlands south of the

564 Serengeti National Park.

565

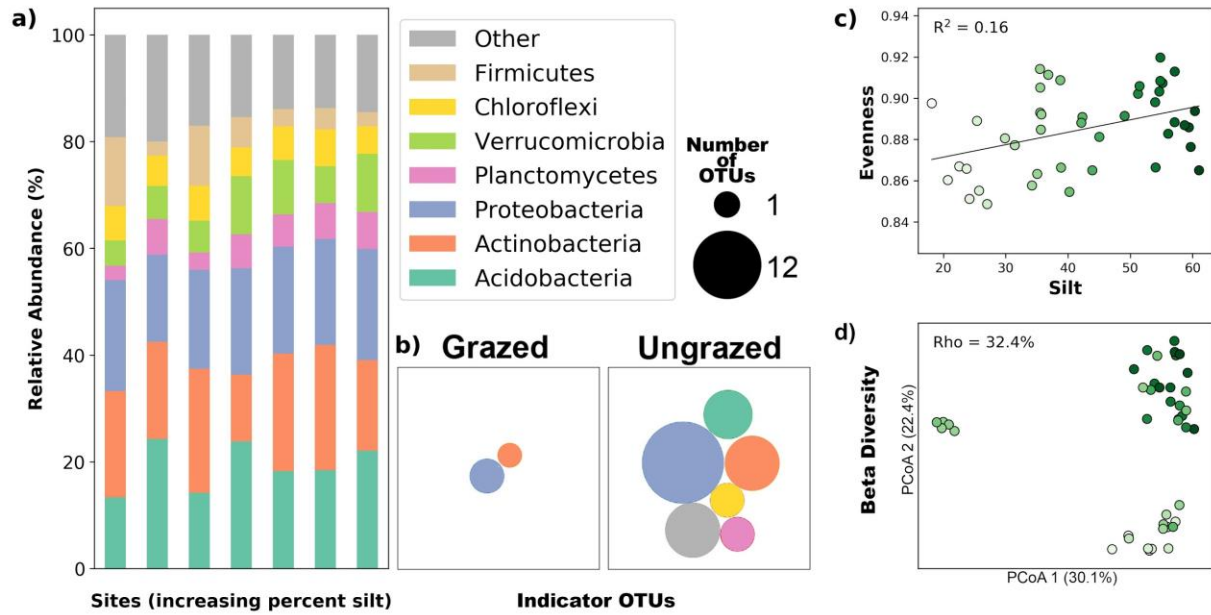

566

567 Figure 3. Illustrations of the bacterial community structure across environmental gradients and  
568 grazing treatments in the Serengeti. a) Correlation between Pielou's evenness, where 1 is  
569 completely even community and 0 in uneven. Points are colored by percent silt, darker colors  
570 are higher values, to facilitate interpretation of b) beta diversity as determined by Bray-Curtis  
571 dissimilarity. Spearman's rho value is reported to illustrate the correlation between beta diversity  
572 and percent silt (green gradient). c) Relative abundance of bacterial phyla. d) Visualization of  
573 indicator species grouped by phyla, indicated by colors. Area of each circle represents the  
574 number of indicator OTUs within each phylum.

575



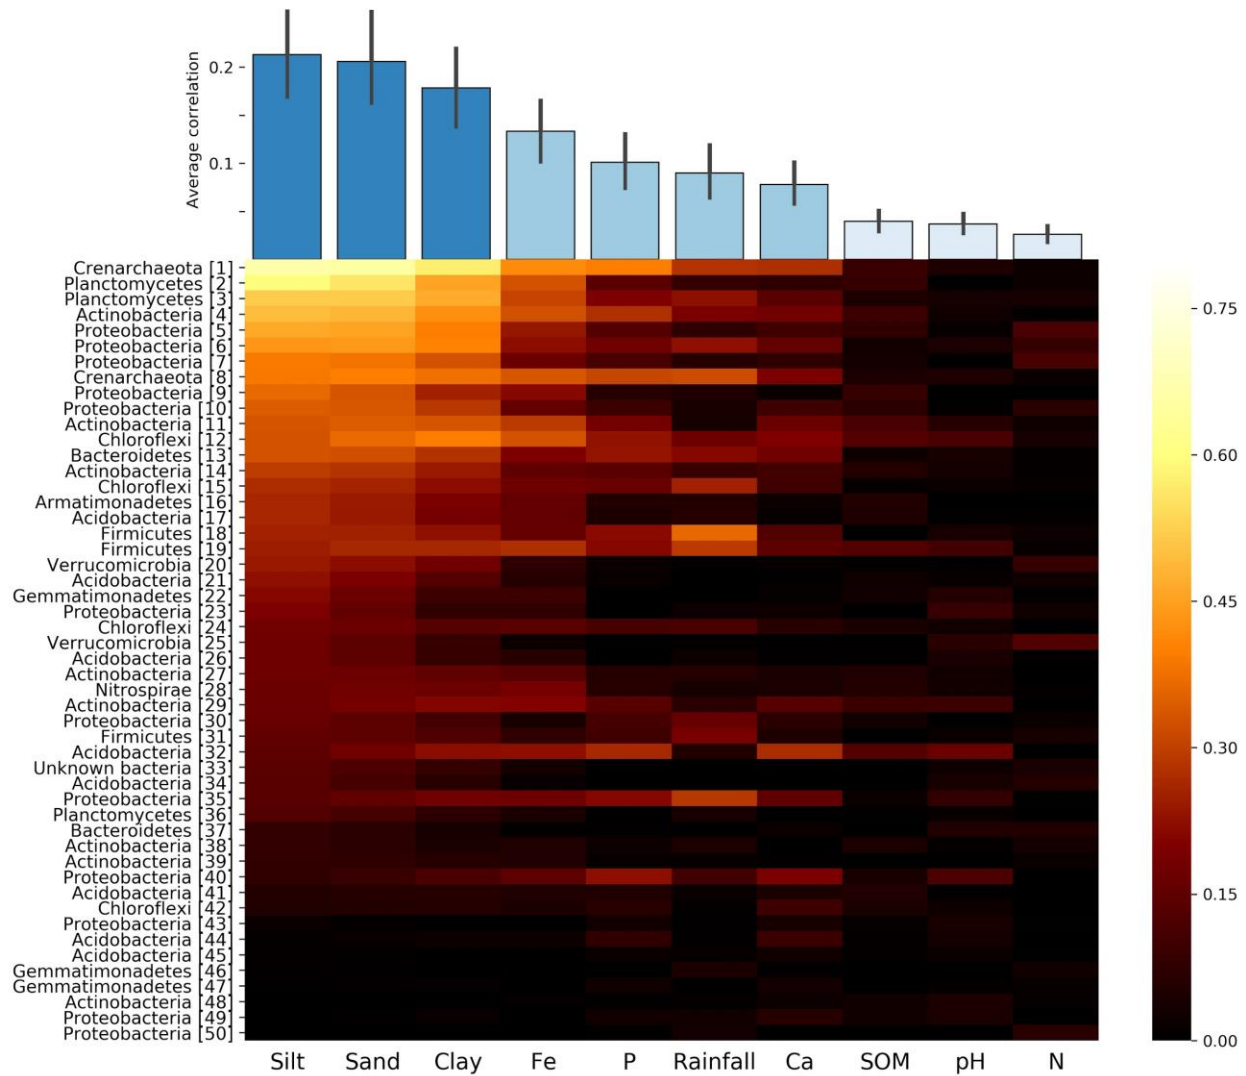

576

577 Figure 4. Correlation values for comparisons of relative abundance of 16S rRNA for individual  
 578 operational taxonomic units (OTUs) and abiotic variables. Phyla for the 50 most abundant OTUs  
 579 are displayed on the y-axis. The top-left most value is the highest correlation, and values are  
 580 sorted into descending order for each abiotic variable and OTU. Blue bars above the heatmap  
 581 represent the average correlation, with a 95% confidence interval, for each environmental  
 582 variable. Blue shades are used to emphasize visual differences and do not represent a  
 583 statistical difference.
